# Supplementary material
Source: PubMed Central journal article supplement (PMC5945288)
Supplement: NIHMS963757-supplement-Supplemental.pdf [file NIHMS963757-supplement-Supplemental.pdf]

**Supplemental Figure 1.** Purified CRAC<sup>336WT</sup> peptide characterized by reversed-phase HPLC and MALDI-TOF MS. (A) MALDI-TOF spectrum of the purified CRAC peptide. The calculated molecular weight of the CRAC peptide = 2512.9 g/mol. (B) An analytical HPLC chromatograph exhibiting the CRAC peptide peak at 12.498 minutes.

**Supplemental Figure 2.** Isothermal Titration Calorimetry Experiments. (A) Types of ITC Experiments Performed. **A** 10 mM of 100% POPC liposomes were titrated into 100 μM of LtxA. LtxA interacts with one set of  $n$  sites (POPC lipid molecules). **B** 10 mM of 60% POPC/40% Chol liposomes were titrated into 100 μM of LtxA. LtxA interacts with two sets of  $n$  sites (POPC or Chol lipid molecules). **C** 7.65 mM of CRAC<sup>336WT</sup> was titrated into 2 mM 100% POPC. CRAC<sup>336WT</sup> interacts with one set of  $n$  sites (POPC lipid molecules). **D** 7.65 mM of CRAC<sup>336WT</sup> was titrated into 2 mM 60% POPC/40% sterol liposomes. CRAC<sup>336WT</sup> interacts with two sets of  $n$  sites (POPC or sterol lipid molecules). (B) Raw ITC Heats of Injection for LtxA and POPC, POPC/Chol. ITC measurements were performed at 30 °C in a Low Volume Nano ITC. 50 μL of a liposome solution (10 mM) was injected into a cell containing 100 μM LtxA. Triangles depict each 1 μL injection of 100% POPC titrated into LtxA. Circles depict each 1 μL injection of 60% POPC/40% Chol titrated into LtxA. Lines of best fit are shown, with long dashes depicting POPC/Chol and short dashes depicting POPC. (C) Raw ITC Heats of Injection for CRAC<sup>336WT</sup> and POPC, POPC/Chol. ITC measurements were performed at 30 °C in a Low Volume Nano ITC. 50 μL of CRAC<sup>336WT</sup> (7.65 mM) was injected into a cell containing 2 mM liposome solution. Inverted triangles depict each 2.5 μL injection of CRAC<sup>336WT</sup> titrated into 100% POPC. Squares depict each 2.5 μL injection of CRAC<sup>336WT</sup> titrated into 60% POPC/40% Chol. Lines of best fit are shown, with long dashes depicting POPC/Chol and short dashes depicting POPC. (D) Raw ITC Heats of Injection for CRAC<sup>336SCR</sup> and POPC, POPC/Chol. ITC measurements were performed at 30 °C in a Low Volume Nano ITC. 50 μL of CRAC<sup>336WT</sup> (7.65 mM) was injected into a cell containing 2 mM liposome solution. Squares depict each 2.5 μL injection of CRAC<sup>336SCR</sup> titrated into 100% POPC. Circles depict each 2.5 μL injection of CRAC<sup>336SCR</sup> titrated into 60% POPC/40% Chol. Lines of best fit are shown, with short dashes depicting POPC/Chol and long dashes depicting POPC.

**Supplemental Figure 3.** Raw CD Data. Spectral scans were performed in 10 mM phosphate buffer, using a peptide concentration of 0.25 mg/mL. To ensure that the spectra represent the structure of only bound peptide, unbound peptide was removed using centrifugal filters. Mean residue ellipticity was calculated for each spectrum.

**Supplemental Figure 4.** Isothermal Titration Calorimetry Experiments with Various Sterols. Raw ITC Heats of Injection. ITC measurements were performed at 30 °C in a Low Volume Nano ITC. 50  $\mu$ L of CRAC<sup>336WT</sup> (7.65 mM) was injected into a cell containing 2 mM liposome solution. Triangles depict each 2.5  $\mu$ L injection of CRAC<sup>336WT</sup> titrated into 60% POPC/40% DHC. Squares depict each 2.5  $\mu$ L injection of CRAC<sup>336WT</sup> titrated into 60% POPC/40% Desmo. Diamonds depict each 2.5  $\mu$ L injection of CRAC<sup>336WT</sup> titrated into 60% POPC/40% Desmo. Lines of best fit are shown, with long dashes depicting POPC/Desmo, short dashes depicting POPC/DHC, and combined long and short dashes depicting POPC/CC.

**FIGURES**

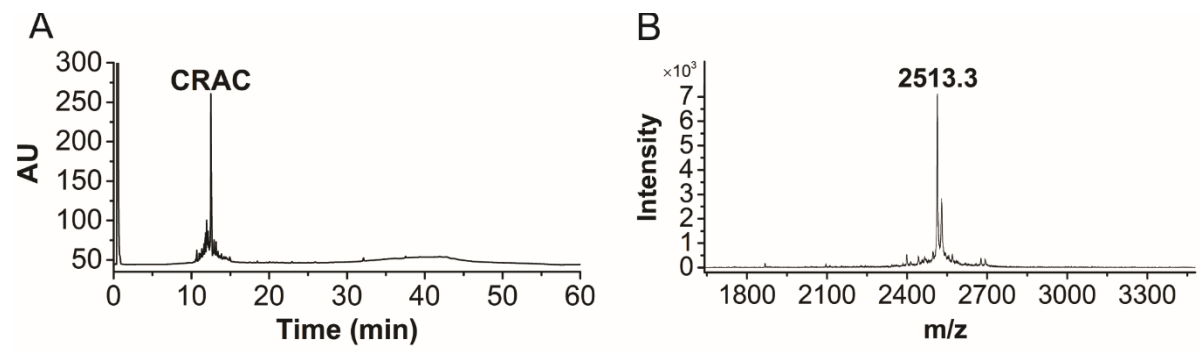

**Supplemental Figure 1**

**A**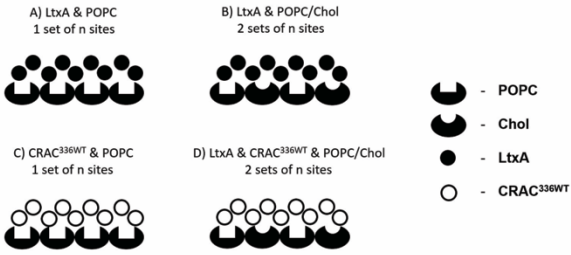**B**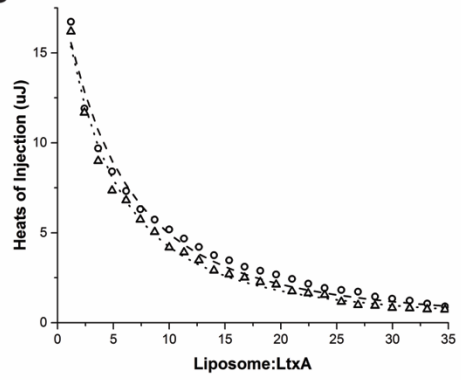**C**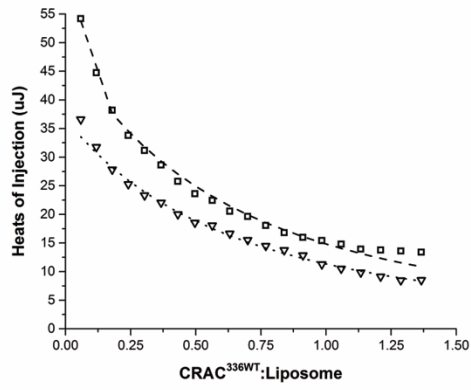**D**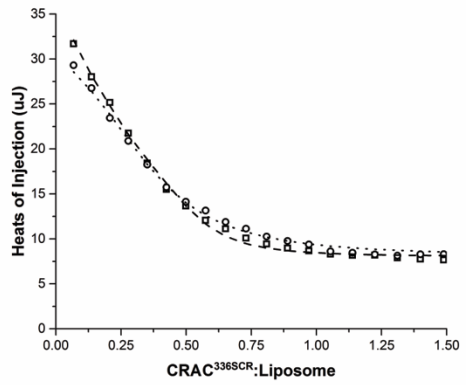**Supplemental Figure 2**

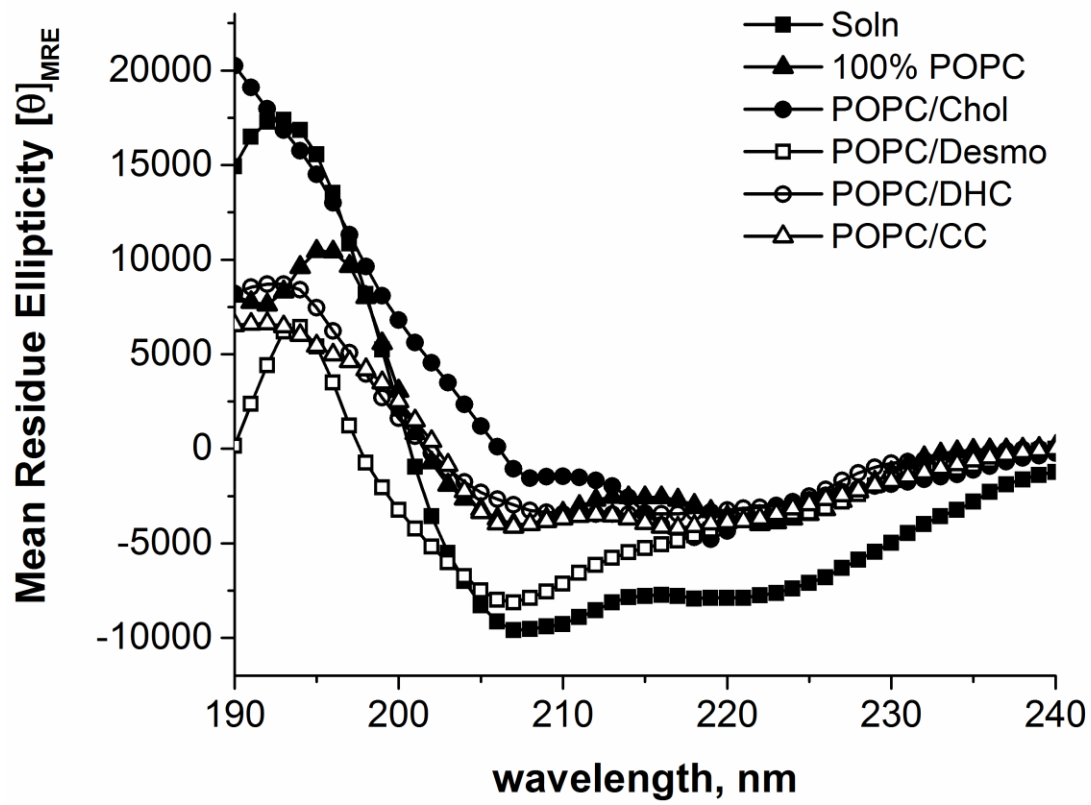

Supplemental Figure 3

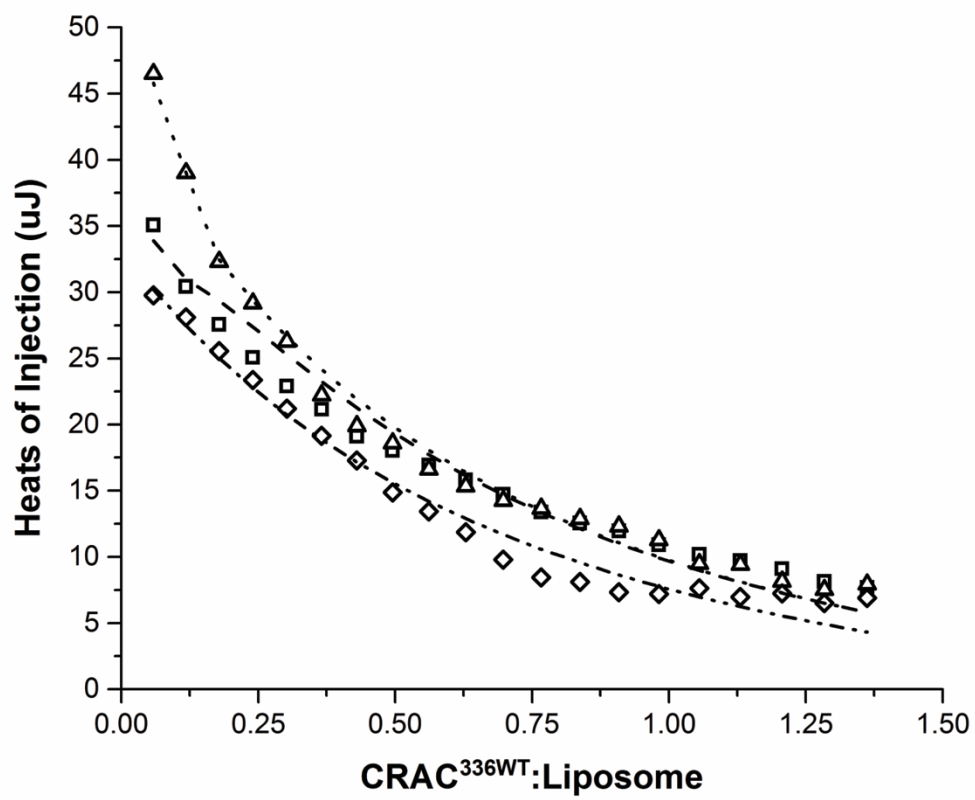

Supplemental Figure 4
